# Supplementary material for: Speed vs completeness: a comparative study of solitary and colonial tunicate embryogenesis
Source: Front Cell Dev Biol. 2025 Mar 11;13:1540212. doi: 10.3389/fcell.2025.1540212 (PMC11933078; doi:10.3389/fcell.2025.1540212)
Supplement: Supplementary file 3 [file Table1.xlsx]

## Sheet: Sheet1
Table S1. List of anatomical entities, their specification, abbreviations used in Figures, and definitions, used to describe the embryo development of B. schlosseri. Definitions are provided for entities characterizing ascidian development and are referred to B. schlosseri (when not differently specified). Blue rows: entities used to describe the embryo development both in B. schlosseri and C. ro…				Table S1. List of anatomical entities, their specification, abbreviations used in Figures, and definitions, used to describe the embryo development of B. schlosseri. Definitions are provided for entities characterizing ascidian development and are referred to B. schlosseri (when not differently specified). Blue rows: entities used to describe the embryo development both in B. schlosseri and C. ro…
Table S1. List of anatomical entities, their specification, abbreviations used in Figures, and definitions, used to describe the embryo development of B. schlosseri. Definitions are provided for entities characterizing ascidian development and are referred to B. schlosseri (when not differently specified). Blue rows: entities used to describe the embryo development both in B. schlosseri and C. ro…				Table S1. List of anatomical entities, their specification, abbreviations used in Figures, and definitions, used to describe the embryo development of B. schlosseri. Definitions are provided for entities characterizing ascidian development and are referred to B. schlosseri (when not differently specified). Blue rows: entities used to describe the embryo development both in B. schlosseri and C. ro…
Ampulla		amp	Ectodermal anterior evagination containing hemocytes. There are eight ampullae in the larva; at metamorphosis, they are involved in the larval adhesion to the substrate. Their growth gives rise to the colonial circulatory system.
Apical trunk epidermal neurones (ATEN)			Epidermal sensory neurons located in the apical part of the trunk
Atrial cavity		Ac	Cavity around the dorsum and sides of the pharynx (into which the stigmata open) and which open to the exterior by the dorsal atrial siphon. See also Atrial siphon. Synonym: atrial chamber.
Atrial siphon (primordium)		Asp	Rudiment of the dorsal, cylindrical body extension by which the dorsal aperture is projected. In B. schlosseri, the rudiment of the atrial siphon, atrial cavity, peribranchial chamber and cloacal cavity is a single dorsal ectodermal invagination originating from the posterior dorsal groove; in C. robusta, there are two dorsal, symmetrical invaginations of the ectoderm, one on the left and one on …
Blastomere
	Animal blastomere
	Vegetal blastomere
Blastopore
Blastozooid			Zooid derived by asexual reproduction (or blastogenesis).
Blastula
Blood lacuna			Space between organs and in body wall in which haemocytes flow.
Blood sinuses			Channel between organs and in body wall in which haemocytes flow
Body wall			Space delimited by the epidermis and the peribranchial/atrial walls; it contains connective tissue, muscles, neural complex, nerves, haemocytes, haemocele, and heart. Synonym: mantle.
Branchial cavity			Cavity delimited by the branchial epithelium. Synonym: branchial cavity, pharynx.
Bud		B
	Left bud	Lb
	Right bud	Rb
Central nervous system (larval)		CNS	Main structures of the central nervous system: sensory vesicle, the neck, the visceral ganglion, and the tail nerve cord.
Cleavage
Dorsal caudal epidermal neurones (DCEN)			Up to ten pairs of sensory neurons located in the dorsal caudal epidermis.
Dorsal groove		dg	Dorsal ectodermal invaginations, extending antero-posteriorly in the middle embryonic ectoderm. Initially it is in the form of a wide depression. It originates the ectodermal component of the oral and atrial siphon rudiments.
Dorsal lamina		dl	Longitudinal fold of the mid-dorsal branchial wall.
Ectoderm
Egg			Female gamete. It prduces an acellular vitelline coat.
Egg envelopes
	Inner follicle cell	ifc	Accessory cells lying on the vitelline coat, covered by outer follicle cells before ovulation. After ovulation, they participate in the formation of the placental cup.
	Outer follicle cell		Outermost layer of accessory cells. At ovulation, they remain in the ovary.
	Test cell	tc	Accessory cell encased in superficial depression of the oocyte. In spawned eggs, test cells allow buoyancy.
	Vitelline coat		Acellular sheath produced by the oocyte during oogenesis. Synonym: chorion.
Endoderm
Endodermal strand		est	Strand of endodermal cells located in the tail, ventrally to the notochord.
Endostyle (primoridium)		en	Deep groove along the ventral mid-line of the branchial chamber, consisting of eight major longitudinal cellular bands (zones). It is considered homologous to the vertebrate tyroid gland.
Epidermis		epi	Ectodermal monolayered leaflet enveloping the individual. It produces the tunic.
Esophagus		es	First segment of the postpharyngeal tract, consisting mainly of ciliated cells secreting mucus; it contains also endocrine cells. Synonym: oesophagus.
Gastrula
Germline precursor			Gamete precursors.
Gut (primordium)		gp	Endodermal tissue posterior to protostigmata.
Haemocoel		haem	Space in which haemocytes flow.
Heart		ht	Curved, short, double-walled tube between the stomach and the posterior end of endostyle.
	Myocardium	mc	Simple, contractile epithelium forming the inner wall of heart tube. It delimits a space in which the hemocytes flow.
	Pericardial cavity	pcc	Space delimited by the pericardium and the myocardium
	Pericardium	pe	Simple, non-contractile epithelium forming the outer wall of heart tube.
	Raphe		Longitudinal lips at the border between pericardium and myocardium
Hemocyte		hc	Circulating cell. There are four categories of hemocytes: hemoblast, considered the precursors of other hemocytes; phagocytes (including hyaline amoebocytes and macrophage-like cells); cytotoxic cells (including granular amoebocytes and morula cells); vacuolated cells (including pigment cells and nephrocytes). Synonym: blood cell.
	Hemoblast		Indifferentiated cell, considered a candidate stem cell. Synonym: Lymphocyte-like cell.
	Hyaline amoebocyte		Considered a cell belonging to the Phagocytic line, together with the macrophage-like cell. Both the hyaline amoebocyte and the macrophage-like cell are considered as two different fucntional stages of the same cell type.
	Morula cell		Cytotoxic immunocyte.
	Phagocytic cell		Considered a cell belonging to the Phagocytic line, together with the hyaline amoebocyte. Both the phagocytic cell and the hyaline amoebocyte are considered as two different functional stages of the same cell type. Synonym: macrophage-like cell.
	Pigment cell		Cell storeging pigments. It belongs to storage cells, together with nephrocytes.
Hatched larva
Intestine		int	Alimentary tract posterior to stomach; subdivided in three segments: proximal, mid and terminal (distal or rectum) intestine; it contains also endocrine cells.
	Mid-intestine		Intermediate tract of intestine encrosted by tubules and ampullae of the pyloric gland. It is located between the Proximal intestine (first tract of inestine, or preglaundular intestine) and the Distal intestine (terminal intestine or rectum).
Left ganglionic vesicle			Small vesicle located dorsally slightly on the left, embedded in the visceral ganglion.
Mesenchyme		mech	Mostly spherical cell, able to migrate. Mesenchymal cells are located bilaterally in the trunk region of the tailbud embryo.
	Trunk mesenchyme	trunk mes
Mesodermal cells
Muscle cell (precursor)		mcp
Neck		ne	Central nervous system region corresponding to the vertebrate midbrain.
Nerve cord		nc	Central nervous system region in the larval tail containing some neurons. Synonym: caudal nerve cord.
Neural complex			Cerebral ganglion and the neural gland complex (dorsal to the former); it is located, in the dorsal mantle between the two siphons.
	Neural gland complex		Gland in form of a blind sac located in the dorsal mantle, dorsal to the cerebral ganglion and opened in the prebranchial chamber. Synonym: hypophysis.
	Cerebral ganglion	cg	Adult brain, organized in a cortex of neuronal somata and an inner medulla of neurites continuous with nerves. Synonym: brain.
	Ciliated funnel	cf	Funnel-like duct of neural gland opening into the prebranchial pharynx.
Neural plate
Neural fold
Neural tube
Neurohypophyseal duct		nd	Oozooid neural complex rudiment recognizable as blind tube. Synonyms: neurohypophysis, neurohypophysial placode, neurohypophysial canal.
Neuropore		np
Neurula
Notochord		noto	Flexible rod that extends backward from the posterior part of the larval trunk and forms the tail axis. It is the skeletal device providing support for the fin, the epidermis, the muscle, the endodermal strand, and the nerve cord. This support is lost during metamorphosis, when the tail is retracted. It is located at the tail midline and surrounded by the dorsal hollow of the nerve cord, the bila…
Ocellus			Light-sensing organ.
Oral siphon (primordium)		osp	Cylindrical body extension by which the anterior aperture is projected. In embryo, its rudiment is also called stomodeum and it contributes to the formation of the oral siphon, the velum and the tentacles. It differentiates oral secreting tunic cells, sensory ciliated cells of the tentacles and epidermal sensory neurons. Synonym: branchial aperture; mouth; incurrent opening, inhalant opening.
Otolith			Gravity-sensing organ. Synonym: statocyte
Oozooid			Filter-feeding individual derived from a metamorphosed larva. It is considered the colony founder.
Papilla (rudiment)		pp	Sensory organ differentiating from the anterior ectoderm, constituted of axial columnar cells and primary sensory neurons. There are three papillae, two dorsl, one ventral, in a triradial arrangement. Synonym: palp.
	Dorsal-Left papilla	D-Lpp
	Dorsal-Right papilla	D-Rpp
	Interpapillary region	Ip	Ectodermal region of secreting cells located at the center of the papilary triangle providing sticky material for temporary adhesion of the larva to the substrate.
	Ventral papilla	Vpp
	Papillary neuron	ppn	Sensory neurons in papillae most likely playing a role in substrate sensing/selection. Synonym: palp neurons.
Peribranchial chamber		pbc	Two lateral and symmetrical cavities lying to each side of the pharynx, jointed dorsally into the atrial cavity and communicating with the pharynx by means of stigmata. Synonym: peribrancial cavity.
	Left peribranchial chamber	Lpbc
	Right peribranchial chamber	Rpbc
	Peribranchial epithelium		Epithelium delimiting the peribranchial cavities; it can be subdivided into an inner component (taking part to the branchial wall), and an outer component delimiting the mantle. Synonym: peribranchial wall.
Perivisceral epithelium			Ip
Perivitelline space		pvs	Space between the egg/embryo and the vitelline coat. After fertilization, it is invaded by test cells.
Pharynx		pha	Organ extending from the rings of tentacles to the mouth of the esophagus. Synonym: branchial cavity, branchial sac, endodermal cavity.
	Anterior pharynx	pha ant
	Left pharynx wing	left pha wing
	Pharynx lumen	pha lum
	Right pharynx wing	right pha wing
Photolith		Pl	Sensory organ typical of Styelid ascidians, located in the sensory vesicle, composed of one pigment cell (the statocyst), which receives the extensions of the photoreceptor cells.
Placental cup		pc	specialised structure for brooding the embryo in the peribranchial chamber. It forms with participation of the oviduct and the inner follicle cells. Synonym: brood pouch.
Protostigma		psm	Elliptical fissure permitting comunication between the branchial and the peribranchial chambers; delimited by seven rows of ciliated cells, with cilia forming a single row in each cell. The larva has five pairs of perforated protostigmata.
Pyloric caecum		pyl	Short, blindly ending pouch arising from the junction of the stomach and the intestine, on the posterior side, and projecting in a dorsal direction. Acording to Nakazawa et al., 2013, the lumen of the gut duct becomes divided into two: one duct located ventrally will form the main digestive tract, the other located dorsally will form the duct of pyloric gland. Synonym: hepatopancreas; gastric cae…
Pyloric gland			System of anastomosing and bindly ending tubules spread over the surface of the mid-intestine and the rectum. In continuity with the gut at the junction between the stomach and the intestine.
Rostral trunk epidermal neurones (RTEN)			Sensory neurons located in the rostral trunk epidermis. They derive from a8.26 line.
Sensory vesicle		sv	Vesicle containing the photolith, sensory neurons, and coronet cells that are considered to be homologues of the coronet cells in the saccus vasculosus of fishes.
Stomach (primordium)		stom prim	Large, ovoid sac of the alimentary canal whose wall is folded in up in eight longitudinal ridges.
	Stomach fold
Tail		tail
	Tail muscle cell precursor	tmc
Tailbud
Tentacle (Oral tentacle)		ten	Symmetrical extensions at the base of oral siphon; they are of different lengths: the longest ones (first order tentacles) almost reach to the siphon center; alternating with them, are shorter ones forming a second series. The mechanosensory coronal organ is located on the tentacles. Synonyms: branchial tentacle, oral tentacle.
Trunk		trunk	Synonym: head, cephalenteron.
Tunic (larval tunic)		tun	Tissue external to the epidermis, containing free cells, fibers, and ground substance, produced by the epidermis. It anchors adults to solid substrata, supports and protects the underlying tissues and organs. In the larva, it covers the trunk and tail; in the tail, it forms continuous fins. The larval tunic of the trunk consists of two cuticular layers and two compartments with filamentous matric…
	Definitive tunic		Tunic covering the oozooid. It corresponds to the larval inner compartment of tunic and the inner cuticular layer.
	Inner compartment of tunic		Layer of tunic located beneath the outer compartment. It is covered by a cuticle (called inner cuticular layer) that becomes the surface of the oozooid tunic when the outer cuticular layer and the outer compartment are discarded, soon after the onset of metamorphosis.
	Inner cuticular layer		Outermost surface of oozooid tunic.
	Outer cuticular layer of tunic	OC	Outermost layer of tunic forming the fins. The outer compartment also contains sensory cilia that extend outward from numerous pairs of caudal primary sensory cells, located in rows, within the dorsal and ventral parts of the epide
	Outer compartment of tunic (fins of the tunic)	OCT	Tunic layer covering both the larval trunk and tail.
	Tunic cells	tun-c	Cells including: large granular cells, morula cells, granulocytes I and II, phagocytes.
	Tunic fin	tun fin	Continuous layers of tunic facilitating larval swimming.
Ventral caudal epidermal neurones (VCEN)			Up to ten pairs of sensory neurons located in the ventral caudal epidermis.
Visceral ganglion		vg	Central nervous system component, corresponds to the vertebrate hindbrain.
Zygote
Kott, P. (1985). The Australian Ascidiacea part 1, phlebobranchia and stolidobranchia. Mem. Qld Mus., 23, 1-440.
Burighel, P., Cloney, R. A., & Cloney, B. Microscopic Anatomy of Invertebrates, Vol. 15. Microsc Anat Invertebr. 1997; 15: 221–347.
Ballarin, L., & Cima, F. (2005). Cytochemical properties of Botryllus schlosseri haemocytes: indications for morpho-functional characterisation. European Journal of Histochemistry, 49(3), 255-264.
Sorrentino, M., Manni, L., Lane, N. J., & Burighel, P. (2000). Evolution of cerebral vesicles and their sensory organs in an ascidian larva. Acta Zoologica, 81(3), 243-258.
Hudson, C. (2016). The central nervous system of ascidian larvae. Wiley Interdisciplinary Reviews: Developmental Biology, 5(5), 538-561.

## Sheet: Dictionary
anatomical name used in Figures	abbreviation
absorbed tail tissues	abs tail
absorbing tail	abs tail
ampullae	amp
anterior pharynx	ant pha
atrial chamber	ac
atrial siphon	as
atrial siphon muscle	asm
left atrial siphon primordium	lasp
left atrial siphon primordium	las
atrial siphon primordia	asp
right atrial siphon primordium	ras
right atrial siphon primordium	rasp
blood cells	bc
branchial chamber	brc
central nervous system	CNS
cephalenteron	ceph
cerebral ganglion	cg
cilia of ATEN	cilATEN
cilia of CESN	cilCESN
cilia of RTEN	cilRTEN
ciliated duct	cilduc
colonal organ	col
coronet cells	cor
cuticle	cut
degenerating tail	deg tail
dorsal caudal epidermal neurons	DCEN
dorsal lamina	dl
dorsal sinus	ds
dorsal strand	dst
endodermal strand	esr
endostyle	es
endostyle primordium	esp
epidermis	epi
tunic fin	tf
gill slits	gs
gut primordium	gp
heart	ht
hemocyte	hc
inner compartment of tunic	ict
inner cuticular layer of tunic (C2)	iclt (C2)
intestine	int
larval brain remnants	lbr
mantle	man
medium intestine	mint
mesenchyme	mech
myocardium	mc
neck	ne
nerve cord	nc
neural gland	ng
neurohypophyseal duct	nd
notochord	noto
ocellus	oc
oesophagus	oes
oral siphon muscles	osm
oral siphon	os
oral siphon primordium	osp
osp epidermis	osp epi
otolith	ot
outer compartment of tunic	oct
outer cuticular layer of tunic (C1)	oclt (C1)
papilla(papillae)	pp
peribranchial chamber	pbc
pericardium	pc
peripharyngeal band	pb
pharynx	pha
pharynx lumen	pha lum
posterior brain	post brain
posterior pharynx	post pha
preoral lobe	pl
left protostigmata	ipsm
protostigmata	psm
right protostigmata	rpsm
proximal intestine	prox int
pyloric caecum	pyc
pyloric gland	pg
raphe	rph
remnant of larval brain	rmn lv brain
rostral trunk epidermal neurosn	RTEN
sensory vesicle	sv
stalk	stk
stomach	stom
stomach primordium	stom primrod
tail	tail
tail muscle cells	tmc
tail remnants	tail remn
tentacle	ten
terminal intestine	term int
test cells	tc
trunk	trunk
tunic	tun
tunic - inner compartment of tunic	ict
tunic - inner cuticular layer of tunic (C2)	iclt (C2)
tunic - outer compartment of tunic	oct
tunic - outer cuticular layer of tunic (fin of the tunic) C1	oclt (C1)
tunic cell	tunc
tunic fin	tun fin
velum	ve
ventral caudal epidermal neurons	VCEN
visceral ganglion	vg
